# Supplementary material for: Mendelian randomization analysis of the causal association of bone mineral density and fracture with multiple sclerosis
Source: Front Neurol. 2022 Sep 15;13:993150. doi: 10.3389/fneur.2022.993150 (PMC9519880; doi:10.3389/fneur.2022.993150)
Supplement: Supplementary file 1 [file Table_1.XLSX]

## Sheet: Sheet1
Supplementary Table 1. The 200 identified autosomal non-MHC genome-wide effects
SNP	Effect allele	non-Effect allele	OR for Effect allele	P
rs12708716	G	A	0.8367	3.703e-71
rs1335532	A	G	1.2987	4.549e-70
rs2104286	T	C	1.2062	2.962e-65
rs438613	C	T	1.1504	2.305e-49
rs1800693	T	C	0.87	2.239e-47
rs2255214	G	T	1.1384	6.976e-43
rs3748817	C	T	0.8797	1.541e-36
rs17066096	G	A	1.1444	9.257e-36
rs212397	C	A	0.8828	3.48e-35
rs35540610	C	T	1.1423	2.982e-33
rs1323292	A	G	1.1625	3.644e-33
rs1077667	C	T	1.1546	7.882e-33
rs12087340	C	T	0.8271	2.268e-31
rs8070345	T	C	1.1163	4.05e-31
rs10877012	G	T	1.124	9.626e-31
chr14:88504511	G	A	1.3316	1.667e-30
rs11577426	C	T	0.8849	2.954e-30
rs9843355	G	A	1.1525	4.138e-30
rs506616	G	T	1.1237	1.997e-29
rs12206850	T	C	0.8967	2.717e-29
rs72928038	G	A	0.8663	8.38e-29
rs11567694	G	A	0.8874	1.579e-28
rs17886724	A	G	0.8976	2.32e-28
rs1014486	C	T	1.11	3.133e-28
rs11079784	C	T	1.1074	1.988e-27
rs6589706	A	G	1.11	4.531e-26
rs16902700	G	A	0.8891	2.621e-25
rs11740512	A	C	0.8699	4.544e-25
rs35858108	T	C	1.1127	4.915e-25
rs11554159	A	G	0.893	5.83e-25
rs17030410	T	G	1.1165	1.649e-24
rs1870071	C	T	1.108	4.422e-24
rs3764021	C	T	0.9095	4.961e-24
rs12928822	C	T	1.1463	1.3e-23
rs1250568	T	C	0.9083	1.675e-23
rs12132283	A	C	1.0973	1.112e-22
rs6999228	G	A	0.9026	5.273e-22
rs4609871	C	T	0.9138	1.231e-21
rs361725	C	T	0.8962	1.306e-21
rs35716097	T	C	1.1041	3.182e-21
rs59655222	T	C	1.1049	5.655e-21
rs2364482	T	G	0.8962	1.509e-20
rs12695416	G	A	1.0948	4.914e-20
rs4410871	T	C	0.9074	5.847e-20
rs9321490	C	T	1.1053	9.477e-20
rs12925972	C	T	1.107	1.109e-19
rs2283792	G	T	1.0893	1.161e-19
rs9591325	T	C	1.2276	1.264e-19
rs2248359	T	C	0.9158	1.921e-19
rs12365699	G	A	1.1237	2.099e-19
rs2278300	G	T	1.0953	2.313e-19
rs879036	C	T	0.885	2.746e-19
rs793108	C	T	0.9193	3.496e-19
rs1051738	C	A	1.1171	3.61e-19
rs60600003	T	G	0.8726	4.596e-19
rs6032662	C	T	1.0995	5.284e-19
rs2546890	A	G	1.0878	5.303e-19
rs10951042	C	T	1.1021	1.499e-18
rs9878602	T	G	1.1002	1.914e-18
rs8107548	T	C	0.9113	3.023e-18
rs17119	A	G	1.1108	1.383e-17
rs541503	C	T	0.9209	1.451e-17
rs7923837	G	A	1.086	2.078e-17
rs35703946	G	A	1.1315	2.826e-17
rs8022092	C	A	1.0822	4.136e-17
rs585039	A	C	0.917	7.677e-17
rs10152892	A	C	1.106	8.527e-17
rs9909593	A	G	0.9249	8.565e-17
rs3007421	G	A	0.8928	8.913e-17
rs4772201	A	G	1.11	8.982e-17
rs12330493	T	G	0.9232	1.547e-16
rs9887787	C	T	1.131	1.67e-16
rs28625973	A	G	1.0912	2.582e-16
rs224032	G	A	1.0891	3.014e-16
rs3761959	C	T	1.0804	3.254e-16
rs36090551	G	T	0.9169	5.009e-16
rs3816281	T	G	1.0901	5.082e-16
rs3766374	G	A	1.0875	6.096e-16
chr4:103551603	G	A	1.0927	7.026e-16
rs2306593	T	C	0.9161	1.134e-15
rs72922276	G	A	1.1642	1.408e-15
rs10914539	G	T	0.8835	1.436e-15
rs62626325	G	A	1.1372	1.755e-15
rs8006649	G	A	0.9138	1.982e-15
rs1801133	A	G	0.9033	2.305e-15
rs108990	T	C	0.9082	3.045e-15
rs71624119	G	A	1.0944	3.89e-15
rs58394161	T	C	0.8829	1.37e-14
rs12106877	T	C	0.9298	2.754e-14
rs756699	T	C	1.1116	2.964e-14
rs7196953	G	A	0.9252	3.695e-14
rs1151625	C	T	1.1492	4.106e-14
rs12086448	A	G	1.0741	4.123e-14
rs17797448	C	T	1.1431	6.071e-14
rs883871	G	A	0.8865	8.561e-14
rs9308424	A	G	0.9136	9.251e-14
rs2957873	A	G	0.9169	1.465e-13
rs719316	T	C	1.0723	1.615e-13
rs2084007	C	T	1.0835	1.912e-13
rs6738544	C	A	1.0741	2.402e-13
rs883263	G	A	0.9214	2.99e-13
rs175706	G	A	1.0832	5.557e-13
rs2445610	G	A	1.0728	5.658e-13
rs249677	C	A	0.9313	5.733e-13
rs7183707	G	T	0.9177	1.126e-12
rs11605422	C	T	0.9235	1.745e-12
rs12373588	T	G	0.9346	1.783e-12
rs3809006	T	C	0.9366	4.409e-12
rs2289746	C	T	1.0846	4.588e-12
rs17780429	G	A	1.1008	5.153e-12
rs6435203	A	G	1.076	6.175e-12
rs4409785	T	C	0.9196	6.873e-12
chr11:14876718	G	A	0.7772	8.757e-12
rs9292776	G	A	0.9331	1.017e-11
rs57116599	A	G	0.9137	1.109e-11
rs694739	A	G	1.0681	1.122e-11
rs2705618	T	C	0.9283	1.151e-11
rs10245867	G	T	0.9349	1.216e-11
rs17470892	T	C	0.9376	1.338e-11
rs10936599	C	T	1.0766	1.9e-11
rs34681760	C	T	1.0819	2.009e-11
rs7690934	C	T	0.9384	2.363e-11
rs34536443	G	C	1.204	3.39e-11
rs11673987	A	G	1.0679	3.468e-11
rs2726518	A	C	0.9368	3.843e-11
rs3184504	T	C	1.0643	4.236e-11
rs4545915	A	G	0.918	4.847e-11
rs4821544	T	C	1.07	5.218e-11
rs2413436	A	G	1.0645	5.354e-11
chr3:100902575	T	C	1.1557	6.418e-11
rs1399180	T	C	0.9078	7.156e-11
rs921911	A	G	1.0876	7.686e-11
chr11:118762073	G	A	1.2659	8.755e-11
rs4743150	C	T	1.0774	1.231e-10
rs12206238	C	T	0.8919	1.308e-10
rs17051321	C	T	0.9222	1.405e-10
rs7216796	A	G	1.0617	2.092e-10
rs1041796	T	C	0.904	2.621e-10
rs706015	T	G	0.926	3.047e-10
rs2616277	C	T	0.9192	3.129e-10
chr8:95826590	T	C	0.8674	3.225e-10
chr6:119215402	A	C	1.0776	3.242e-10
rs11897084	A	G	1.0836	3.854e-10
rs9947399	G	A	1.0626	3.897e-10
rs767455	T	C	1.166	4.126e-10
rs2082881	A	G	0.9338	5.445e-10
rs3801275	T	C	1.1282	6.344e-10
rs10171296	A	G	1.0912	6.897e-10
rs6550177	T	C	1.0603	7.633e-10
rs6832151	G	T	1.0775	7.79e-10
rs735120	C	T	1.0813	7.988e-10
rs9282641	G	A	1.1199	8.322e-10
rs802725	T	G	1.0653	1.08e-09
rs72981578	C	T	0.9024	1.131e-09
rs4468527	G	A	0.9132	1.19e-09
rs531612	C	T	0.9355	1.205e-09
rs9846396	C	T	1.0595	1.304e-09
rs7260482	A	C	0.9278	1.426e-09
rs6427540	C	T	1.106	1.479e-09
rs7550552	T	C	0.9404	1.48e-09
rs10141746	G	A	0.9288	1.818e-09
rs771767	G	A	0.9301	1.988e-09
rs233100	A	G	0.9425	2.059e-09
rs307896	G	A	1.0769	2.443e-09
rs10271373	C	A	0.9459	3.11e-09
chr3:112693983	T	G	1.3609	3.241e-09
rs4728142	G	A	0.9449	3.371e-09
rs1985372	T	C	0.9084	4.089e-09
rs9937051	T	C	1.0878	4.297e-09
rs969625	G	A	0.9357	4.651e-09
rs9562970	G	A	0.9175	4.803e-09
rs12460421	A	G	1.0581	5.273e-09
rs13150896	G	A	1.066	5.549e-09
rs2992	T	C	0.9324	5.561e-09
rs4812773	C	T	1.0743	6.169e-09
rs11023242	C	T	1.0953	6.344e-09
rs962052	C	T	1.0628	8.279e-09
rs137956	C	T	1.0568	9.634e-09
rs2027982	C	T	1.0652	1.061e-08
rs1059091	G	A	0.9266	1.358e-08
rs9839229	T	C	1.0666	1.495e-08
rs1534422	A	G	0.9482	1.657e-08
chr1:154977113	A	G	0.8448	1.667e-08
rs7014582	G	A	1.0639	1.758e-08
rs61708525	G	A	1.0702	1.799e-08
rs13193887	T	G	0.9386	2.145e-08
rs11587215	G	A	0.9203	2.887e-08
rs1610555	G	T	0.9482	2.917e-08
rs6952809	C	T	0.9376	2.949e-08
rs32658	G	T	0.9406	3.24e-08
rs10747454	G	T	0.931	3.318e-08
rs3931757	T	C	0.9126	4.057e-08
rs13551	T	C	0.9359	4.359e-08
rs17741873	G	T	1.0676	4.686e-08
rs9913257	C	T	1.0648	4.762e-08
chr3:159628081	A	G	1.0971	4.987e-08
rs719219	A	G	1.0591	5.118e-08
rs9808753	G	A	1.082	1.595e-09
rs6072343	G	A	0.9246	2.692e-09
rs2639453	C	T	1.071	2.267e-09
